# Supplementary material for: Development of a Mathematical Model to Forecast Solar Radiation and Validating Results Using Machine Learning Technique
Source: Research Square preprint supplement (doi:10.21203/rs.3.rs-669429/v1), 2021-06-30
Supplement: Supplementary file 1 [file 064116bc3616578f26a789a7.docx]

= +
